# Supplementary material for: Two-way coupled meteorology and air quality models in Asia: a systematic review and meta-analysis of impacts of aerosol feedbacks on meteorology and air quality
Source: Copernicus journal article supplement (doi:10.5194/acp-22-5265-2022), 2022-04-22
Supplement: Supplementary file 1 [file acp-22-5265-2022-supplement.zip]

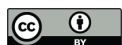

## *Supplement of*

# **Two-way coupled meteorology and air quality models in Asia: a systematic review and meta-analysis of impacts of aerosol feedbacks on meteorology and air quality**

**Chao Gao et al.**

*Correspondence to:* Aijun Xiu ([xiuaijun@iga.ac.cn](mailto:xiuaijun@iga.ac.cn)) and Xuelei Zhang ([zhangxuelei@iga.ac.cn](mailto:zhangxuelei@iga.ac.cn))

- [acp-22-5265-2022-supplement-title-page.pdf](#)
- [Table S1.xlsx](#)
- [Table S2.xlsx](#)
- [Table S3.xlsx](#)
- [Table S4.xlsx](#)
- [Table S5.xlsx](#)

The copyright of individual parts of the supplement might differ from the article licence.
